# Supplementary material for: Trends in Diabetic Retinopathy, Visual Acuity, and Treatment Outcomes for Patients Living With Diabetes in a Fundus Photograph–Based Diabetic Retinopathy Screening Program in Bangladesh
Source: PubMed Central journal article supplement (PMC6902843; doi:10.1001/jamanetworkopen.2019.16285), 2019-11-27
Supplement: jamanetwopen-2-e1916285-s001.pdf [file jamanetwopen-2-e1916285-s001.pdf]

## Supplementary Online Content

Muqit MMK, Kourgialis N, Jackson-deGraffenried M, et al. Trends in diabetic retinopathy, visual acuity, and treatment outcomes for patients living with diabetes in a fundus photograph–based diabetic retinopathy screening program in Bangladesh. *JAMA Netw Open*. 2019;2(11):e1916285. doi:10.1001/jamanetworkopen.2019.16285

**eTable.** Association of Urban and Rural Centers, Sex, and Age With Diabetic Retinopathy

This supplementary material has been provided by the authors to give readers additional information about their work.

**eTable.** Association of Urban and Rural Centers, Sex, and Age With Diabetic Retinopathy

|                                   | Age group                  |                            |                             |                          |
|-----------------------------------|----------------------------|----------------------------|-----------------------------|--------------------------|
|                                   | 0-20                       | 21-39                      | 40-59                       | 60+                      |
| OR* of Urban/rural developing DR† | 14.76<br>(3.88-<br>56.09)  | 8.42<br>(67.33-<br>9.69)   | 6.64<br>(6.21-7.1)          | 5.98<br>(5.41-6.62)      |
| OR* of Male/Female developing DR† | 1.554<br>(0.532-<br>4.540) | 1.859<br>(1.629-<br>2.121) | 1.966<br>(1.853 -<br>2.085) | 1.7<br>(1.552-<br>1.862) |

Footnotes: \*OR-odds ratio; †DR- diabetic retinopathy
